# Supplementary material
Source: Royal Society of Chemistry journal article supplement (doi:10.1039/d6cp00699j)
Supplement: d6cp00699j1.pdf [file d6cp00699j1.pdf]

## Supporting Information

Table S1: Topological parameters at bond critical points (BCPs) for noncovalent interactions in EDT-(HF), EDT-(H<sub>2</sub>O), and EDT-(NH<sub>3</sub>) clusters calculated at the MP2/aug-cc-pVTZ level of theory. Electron density ( $\rho$ ), Laplacian of electron density ( $\nabla^2\rho$ ), kinetic energy density ( $G_{\text{BCP}}$ ), potential energy density ( $V_{\text{BCP}}$ ), and the ratio  $|V|/G$  are reported in atomic units (a.u.) unless stated otherwise.

| BCP                                       | Interaction | $\rho$ | $\nabla^2\rho$ | $G_{\text{BCP}}$ | $V_{\text{BCP}}$ | $ V /G$ |
|-------------------------------------------|-------------|--------|----------------|------------------|------------------|---------|
| <b>EDT-(HF)<sub>1</sub>-I</b>             |             |        |                |                  |                  |         |
| 22                                        | F11-H12←S7  | 0.0319 | 0.0436         | 0.0173           | -0.0238          | 1.37    |
| 27                                        | S9-H10←F11  | 0.0082 | 0.0296         | 0.0064           | -0.0054          | 0.84    |
| <b>EDT-(HF)<sub>2</sub>-I</b>             |             |        |                |                  |                  |         |
| 29                                        | F13-H14←S9  | 0.0334 | 0.0434         | 0.0180           | -0.0252          | 1.40    |
| 25                                        | F11-H12←S7  | 0.0333 | 0.0434         | 0.0180           | -0.0252          | 1.40    |
| 36                                        | S9-H10←F11  | 0.0127 | 0.0484         | 0.0105           | -0.0088          | 0.84    |
| 19                                        | S7-H8←F13   | 0.0127 | 0.0484         | 0.0105           | -0.0088          | 0.84    |
| <b>EDT-(HF)<sub>3</sub>-I</b>             |             |        |                |                  |                  |         |
| 18                                        | F13-H14←S9  | 0.0332 | 0.0436         | 0.0179           | -0.0250          | 1.39    |
| 28                                        | F15-H16←S7  | 0.0241 | 0.0467         | 0.0144           | -0.0171          | 1.18    |
| 38                                        | F11-H12←S7  | 0.0291 | 0.0461         | 0.0165           | -0.0214          | 1.29    |
| 37                                        | S9-H10←F11  | 0.0124 | 0.0473         | 0.0102           | -0.0087          | 0.85    |
| <b>EDT-(H<sub>2</sub>O)<sub>1</sub>-I</b> |             |        |                |                  |                  |         |
| 26                                        | O11-H12←S7  | 0.0193 | 0.0428         | 0.0115           | -0.0124          | 1.07    |
| 28                                        | S9-H10←O11  | 0.0126 | 0.0458         | 0.0095           | -0.0077          | 0.81    |
| <b>EDT-(H<sub>2</sub>O)<sub>2</sub>-I</b> |             |        |                |                  |                  |         |
| 38                                        | O11-H12←S7  | 0.0212 | 0.0448         | 0.0126           | -0.0140          | 1.11    |
| 23                                        | S9-H10←O11  | 0.0157 | 0.0601         | 0.0129           | -0.0108          | 0.84    |
| 20                                        | O14-H15←S9  | 0.0213 | 0.0448         | 0.0126           | -0.0140          | 1.11    |
| 34                                        | S7-H8←O14   | 0.0158 | 0.0603         | 0.0129           | -0.0108          | 0.84    |
| <b>EDT-(H<sub>2</sub>O)<sub>3</sub>-I</b> |             |        |                |                  |                  |         |

*Continued on next page*

| BCP                                       | Interaction | $\rho$ | $\nabla^2\rho$ | $G_{\text{BCP}}$ | $V_{\text{BCP}}$ | $ V /G$ |
|-------------------------------------------|-------------|--------|----------------|------------------|------------------|---------|
| 26                                        | O11-H12←S7  | 0.0198 | 0.0442         | 0.0120           | -0.0129          | 1.07    |
| 27                                        | S9-H10←O11  | 0.0156 | 0.0598         | 0.0128           | -0.0107          | 0.83    |
| 40                                        | O14-H15←S9  | 0.0212 | 0.0447         | 0.0126           | -0.0139          | 1.10    |
| 41                                        | S7-H8←O14   | 0.0176 | 0.0673         | 0.0147           | -0.0126          | 0.85    |
| 34                                        | O17-H19←S7  | 0.0162 | 0.0419         | 0.0103           | -0.0102          | 0.99    |
| <b>EDT-(NH<sub>3</sub>)<sub>1</sub>-I</b> |             |        |                |                  |                  |         |
| 23                                        | S9-H10←N11  | 0.0208 | 0.0573         | 0.0138           | -0.0133          | 0.96    |
| 26                                        | N11-H14←S7  | 0.0099 | 0.0277         | 0.0060           | -0.0052          | 0.86    |
| <b>EDT-(NH<sub>3</sub>)<sub>2</sub>-I</b> |             |        |                |                  |                  |         |
| 33                                        | S9-H10←N11  | 0.0220 | 0.0597         | 0.0147           | -0.0146          | 0.99    |
| 26                                        | N11-H13←S7  | 0.0119 | 0.0323         | 0.0073           | -0.0065          | 0.89    |
| 20                                        | S7-H8←N15   | 0.0221 | 0.0597         | 0.0147           | -0.0146          | 0.99    |
| 27                                        | N15-H18←S9  | 0.0123 | 0.0324         | 0.0073           | -0.0066          | 0.90    |
| <b>EDT-(NH<sub>3</sub>)<sub>3</sub>-I</b> |             |        |                |                  |                  |         |
| 24                                        | N11-H13←S7  | 0.0109 | 0.0296         | 0.0066           | -0.0058          | 0.87    |
| 23                                        | S9-H10←N11  | 0.0199 | 0.0560         | 0.0133           | -0.0125          | 0.93    |
| 39                                        | C4-H6←N19   | 0.0088 | 0.0282         | 0.0058           | -0.0046          | 0.79    |
| 28                                        | N15-H17←S9  | 0.0105 | 0.0307         | 0.0067           | -0.0058          | 0.86    |
| 35                                        | S7←N19      | 0.0068 | 0.0282         | 0.0056           | -0.0041          | 0.73    |

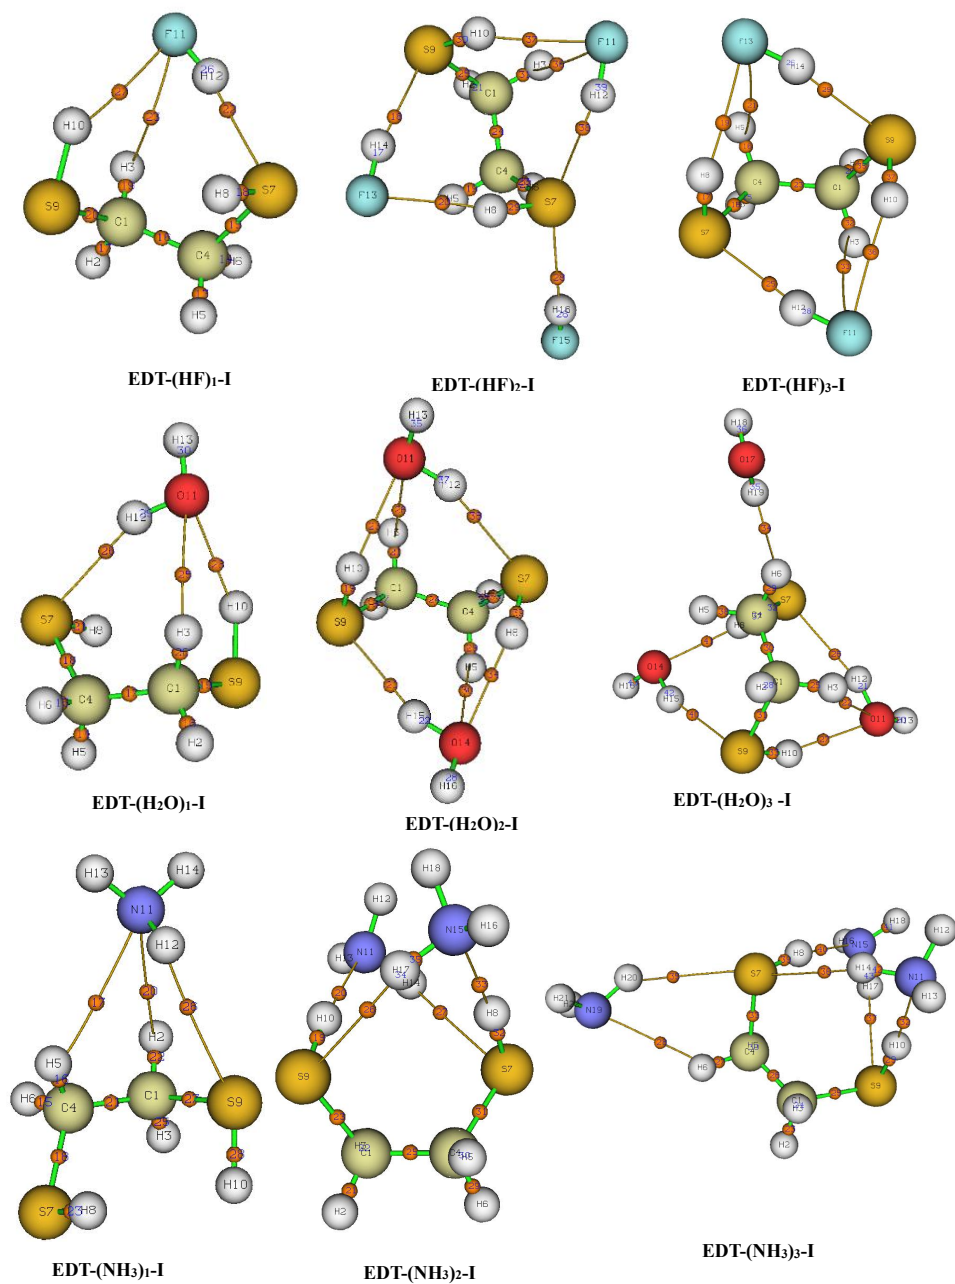

Figure S1: Bond critical points (BCPs) for noncovalent interactions in EDT-(HF), EDT-(H<sub>2</sub>O), and EDT-(NH<sub>3</sub>) clusters at the MP2/aug-cc-pVTZ level of theory.

## Table S2. Optimized Geometries

All geometries are optimized at the MP2/aug-cc-pVTZ level of theory. Cartesian coordinates are given in Å.

### EDT

|   |          |          |          |
|---|----------|----------|----------|
| C | -0.25647 | -0.45918 | 0.54547  |
| H | -0.84553 | -0.73472 | 1.42202  |
| H | -0.53707 | -1.11883 | -0.27370 |
| C | 1.22328  | -0.59198 | 0.86522  |
| H | 1.49993  | 0.05379  | 1.69671  |
| H | 1.44497  | -1.62311 | 1.14613  |
| S | 2.31851  | -0.25102 | -0.54380 |
| H | 2.14910  | 1.07623  | -0.53355 |
| S | -0.77932 | 1.23565  | 0.15126  |
| H | -0.22677 | 1.27171  | -1.06683 |

### HF

|   |         |          |          |
|---|---------|----------|----------|
| F | 3.50754 | 0.55538  | -0.63624 |
| H | 2.84739 | -0.01359 | -0.33582 |

### H<sub>2</sub>O

|   |          |          |          |
|---|----------|----------|----------|
| O | -3.33165 | -0.94358 | -0.41817 |
| H | -2.91756 | -0.07647 | -0.38768 |
| H | -4.23695 | -0.76136 | -0.68573 |

### NH<sub>3</sub>

|   |         |          |          |
|---|---------|----------|----------|
| N | 2.87939 | -1.28721 | -0.27329 |
| H | 2.52929 | -0.67687 | -1.00083 |
| H | 3.04007 | -2.18990 | -0.70193 |
| H | 3.78559 | -0.92761 | -0.00154 |

### EDT-(HF)<sub>1</sub>-I

|   |          |          |          |
|---|----------|----------|----------|
| C | 0.88566  | -0.44126 | 0.95076  |
| H | 1.59685  | -0.98595 | 1.59493  |
| H | 0.5256   | 0.43712  | 1.50637  |
| C | -0.26713 | -1.38666 | 0.58817  |
| H | 0.10637  | -2.27879 | 0.06205  |
| H | -0.77953 | -1.71777 | 1.50809  |
| S | -1.59871 | -0.63289 | -0.44324 |
| H | -0.84367 | -0.47895 | -1.55881 |
| S | 1.87038  | 0.14164  | -0.49542 |

|   |          |         |          |
|---|----------|---------|----------|
| H | 1.14155  | 1.25758 | -0.73263 |
| F | -0.94673 | 2.3439  | 0.36321  |
| H | -1.28448 | 1.49923 | 0.13614  |

**EDT-(HF)<sub>1</sub>-II**

|   |          |          |          |
|---|----------|----------|----------|
| C | -1.35912 | 0.72752  | 0.72047  |
| H | -1.71553 | 1.76987  | 0.78613  |
| H | -1.58794 | 0.22796  | 1.67423  |
| C | 0.14922  | 0.7345   | 0.44958  |
| H | 0.38163  | 1.24245  | -0.49852 |
| H | 0.67133  | 1.26672  | 1.26334  |
| S | 0.91652  | -0.94387 | 0.4247   |
| H | 0.42584  | -1.31722 | -0.78199 |
| S | -2.36885 | -0.03452 | -0.6189  |
| H | -2.12934 | -1.32298 | -0.27827 |
| F | 3.51196  | 0.5592   | -0.63825 |
| H | 2.84296  | -0.0174  | -0.33381 |

**EDT-(HF)<sub>2</sub>-I**

|   |   |          |          |          |
|---|---|----------|----------|----------|
| C | 0 | 0.87546  | -0.43087 | 1.18553  |
| H | 0 | 1.48301  | -0.93357 | 1.9392   |
| H | 0 | 0.37745  | 0.41185  | 1.66124  |
| C | 0 | -0.12898 | -1.42422 | 0.62062  |
| H | 0 | 0.36898  | -2.25905 | 0.13114  |
| H | 0 | -0.73001 | -1.82227 | 1.43925  |
| S | 0 | -1.33426 | -0.73478 | -0.55968 |
| H | 0 | -0.56195 | -0.84998 | -1.64853 |
| S | 0 | 2.07086  | 0.2429   | -0.01371 |
| H | 0 | 1.29195  | 1.23739  | -0.4605  |
| F | 0 | -0.69419 | 2.23575  | -0.08978 |
| H | 0 | -1.02466 | 1.36901  | -0.26722 |
| F | 0 | 1.42324  | -1.66739 | -2.33427 |
| H | 0 | 1.75576  | -1.07491 | -1.67828 |

**EDT-(HF)<sub>2</sub>-II**

|   |          |         |          |
|---|----------|---------|----------|
| C | 0.76438  | 0.76805 | -0.04553 |
| H | 1.16019  | 1.67085 | 0.44989  |
| H | 1.10544  | 0.77498 | -1.09157 |
| C | -0.76437 | 0.76804 | 0.04562  |
| H | -1.10544 | 0.77489 | 1.09166  |

|   |          |          |          |
|---|----------|----------|----------|
| H | -1.16019 | 1.67088  | -0.44974 |
| S | -1.57156 | -0.6405  | -0.83361 |
| H | -1.31924 | -1.57996 | 0.10979  |
| S | 1.57157  | -0.64055 | 0.83359  |
| H | 1.31924  | -1.57994 | -0.10988 |
| F | -4.21162 | 0.52373  | 0.52181  |
| H | -3.56013 | 0.06056  | 0.04007  |
| F | 4.21159  | 0.52376  | -0.52184 |
| H | 3.56012  | 0.06057  | -0.0401  |

**EDT-(HF)<sub>3</sub>-I**

|   |   |          |          |          |
|---|---|----------|----------|----------|
| C | 0 | -0.00141 | 0.71729  | 1.36534  |
| H | 0 | 0.46705  | 0.81949  | 2.34483  |
| H | 0 | -0.80741 | 1.44572  | 1.30103  |
| C | 0 | -0.52101 | -0.70427 | 1.2223   |
| H | 0 | 0.28407  | -1.43504 | 1.26789  |
| H | 0 | -1.21734 | -0.91826 | 2.03406  |
| S | 0 | -1.46429 | -1.0298  | -0.30676 |
| H | 0 | -0.41433 | -1.35632 | -1.07506 |
| S | 0 | 1.28278  | 1.20822  | 0.16835  |
| H | 0 | 0.44518  | 1.61977  | -0.79301 |
| F | 0 | -1.74707 | 1.91885  | -1.25799 |
| H | 0 | -1.8188  | 1.00273  | -1.06399 |
| F | 0 | 1.73511  | -1.55334 | -1.10361 |
| H | 0 | 1.75279  | -0.67937 | -0.74555 |
| F | 0 | -2.32944 | -3.67338 | 1.19896  |
| H | 0 | -2.14351 | -3.01173 | 0.56808  |

**EDT-(HF)<sub>3</sub>-II**

|   |          |          |          |
|---|----------|----------|----------|
| C | -0.70845 | -0.58506 | -0.6131  |
| H | -1.15327 | -1.50415 | -1.02914 |
| H | -1.00883 | 0.25781  | -1.25224 |
| C | 0.81434  | -0.75178 | -0.57021 |
| H | 1.10864  | -1.61658 | 0.04335  |
| H | 1.2005   | -0.90948 | -1.59139 |
| S | 1.73674  | 0.72373  | 0.05424  |
| H | 1.37348  | 0.5951   | 1.35396  |
| S | -1.4848  | -0.35671 | 1.04923  |
| H | -1.51022 | 0.99736  | 1.02214  |
| F | 4.21924  | -1.32888 | -0.03397 |

|   |          |          |          |
|---|----------|----------|----------|
| H | 3.6808   | -0.57604 | 0.0581   |
| F | -4.12133 | -1.09402 | -0.5885  |
| H | -3.49827 | -0.80653 | 0.0432   |
| F | -0.65657 | 2.79522  | -0.36367 |
| H | 0.16865  | 2.36029  | -0.32845 |

**EDT-(H<sub>2</sub>O)<sub>1</sub>-I**

|   |          |          |          |
|---|----------|----------|----------|
| C | 0.74121  | -0.62778 | 0.94529  |
| H | 1.33548  | -1.28961 | 1.59831  |
| H | 0.55999  | 0.31413  | 1.48327  |
| C | -0.57375 | -1.33839 | 0.59758  |
| H | -0.37806 | -2.28685 | 0.07321  |
| H | -1.12622 | -1.56738 | 1.52559  |
| S | -1.75346 | -0.3498  | -0.4176  |
| H | -0.97266 | -0.29996 | -1.52477 |
| S | 1.80961  | -0.26191 | -0.51426 |
| H | 1.37302  | 1.00716  | -0.69439 |
| O | -0.15744 | 2.54621  | 0.34602  |
| H | -0.87297 | 1.91971  | 0.15467  |
| H | -0.56217 | 3.41744  | 0.26851  |

**EDT-(H<sub>2</sub>O)<sub>1</sub>-II**

|   |          |          |          |
|---|----------|----------|----------|
| C | -0.26476 | -0.4673  | 0.5488   |
| H | -0.85929 | -0.75197 | 1.43386  |
| H | -0.55568 | -1.1298  | -0.27967 |
| C | 1.22833  | -0.59309 | 0.868    |
| H | 1.51147  | 0.06325  | 1.70516  |
| H | 1.44692  | -1.63489 | 1.15996  |
| S | 2.34484  | -0.26213 | -0.56002 |
| H | 2.23254  | 1.08698  | -0.5309  |
| S | -0.81088 | 1.25109  | 0.15524  |
| H | -0.28285 | 1.29642  | -1.09149 |
| O | -3.3331  | -0.94421 | -0.41851 |
| H | -2.91193 | -0.07292 | -0.38646 |
| H | -4.24114 | -0.76429 | -0.6866  |

**EDT-(H<sub>2</sub>O)<sub>2</sub>-I**

|   |          |          |         |
|---|----------|----------|---------|
| C | 0.72724  | -0.64344 | 0.93555 |
| H | 1.31542  | -1.31597 | 1.56124 |
| H | 0.56511  | 0.2817   | 1.48445 |
| C | -0.58892 | -1.32231 | 0.58699 |
| H | -0.41253 | -2.26064 | 0.06337 |

|   |          |          |          |
|---|----------|----------|----------|
| H | -1.14595 | -1.54187 | 1.49944  |
| S | -1.7183  | -0.3115  | -0.41884 |
| H | -0.89872 | -0.23513 | -1.47712 |
| S | 1.76157  | -0.26551 | -0.51469 |
| H | 1.35057  | 1.00268  | -0.64461 |
| O | -0.11781 | 2.48515  | 0.35829  |
| H | -0.83279 | 1.85914  | 0.16168  |
| H | -0.52093 | 3.35548  | 0.28662  |
| O | 0.42191  | -1.78752 | -2.36418 |
| H | 1.17581  | -1.28941 | -2.03995 |
| H | 0.09381  | -1.38346 | -3.17083 |

EDT-(H<sub>2</sub>O)<sub>2</sub>-II

|   |          |          |          |
|---|----------|----------|----------|
| C | -0.76481 | -0.62554 | 0.03137  |
| H | -1.10929 | -1.5291  | 0.56263  |
| H | -1.21237 | -0.63531 | -0.97326 |
| C | 0.76484  | -0.62553 | -0.03136 |
| H | 1.21239  | -0.6353  | 0.97327  |
| H | 1.10933  | -1.52908 | -0.56263 |
| S | 1.48363  | 0.78     | -0.98836 |
| H | 1.30408  | 1.72412  | -0.03342 |
| S | -1.48363 | 0.77997  | 0.98838  |
| H | -1.30407 | 1.7241   | 0.03346  |
| O | -3.93752 | -0.90539 | -0.64039 |
| H | -3.57695 | -0.23855 | -0.03805 |
| H | -4.89332 | -0.80451 | -0.56938 |
| O | 3.93749  | -0.90541 | 0.64035  |
| H | 3.57695  | -0.23852 | 0.03804  |
| H | 4.8933   | -0.80461 | 0.56931  |

EDT-(H<sub>2</sub>O)<sub>3</sub>-I

|   |   |          |          |          |
|---|---|----------|----------|----------|
| C | 0 | 0.41715  | -0.41175 | 1.40258  |
| H | 0 | 0.09558  | -0.73321 | 2.39425  |
| H | 0 | 1.49556  | -0.54549 | 1.33796  |
| C | 0 | 0.02484  | 1.04462  | 1.21294  |
| H | 0 | -1.05575 | 1.17421  | 1.2317   |
| H | 0 | 0.44626  | 1.64428  | 2.02081  |
| S | 0 | 0.63845  | 1.81497  | -0.32354 |
| H | 0 | -0.4111  | 1.48211  | -1.09158 |
| S | 0 | -0.35288 | -1.58637 | 0.24099  |
| H | 0 | 0.59622  | -1.50041 | -0.70258 |
| O | 0 | 2.57282  | -0.7159  | -1.19986 |
| H | 0 | 2.19642  | 0.17414  | -1.11109 |

|   |   |          |          |          |
|---|---|----------|----------|----------|
| H | 0 | 3.24519  | -0.63783 | -1.88321 |
| O | 0 | -2.34429 | 0.60568  | -1.19897 |
| H | 0 | -1.94895 | -0.21239 | -0.85356 |
| H | 0 | -3.05693 | 0.3172   | -1.77694 |
| O | 0 | -0.09336 | 4.2208   | 1.83014  |
| H | 0 | -0.25393 | 5.15607  | 1.67634  |
| H | 0 | 0.04373  | 3.84948  | 0.94756  |

EDT-(H<sub>2</sub>O)<sub>3</sub>-II

|   |          |          |          |
|---|----------|----------|----------|
| C | -0.69944 | -0.51712 | -0.56042 |
| H | -1.15544 | -1.45092 | -0.91448 |
| H | -1.01262 | 0.28713  | -1.23345 |
| C | 0.81654  | -0.68778 | -0.54751 |
| H | 1.12602  | -1.50758 | 0.10985  |
| H | 1.16726  | -0.92332 | -1.56159 |
| S | 1.78186  | 0.81782  | -0.0673  |
| H | 1.39174  | 0.83652  | 1.23313  |
| S | -1.44956 | -0.19176 | 1.1016   |
| H | -1.51891 | 1.15899  | 0.97833  |
| O | 4.09765  | -1.65783 | 0.04145  |
| H | 3.71942  | -0.76597 | 0.0975   |
| H | 5.03845  | -1.54429 | 0.2183   |
| O | -0.83864 | 2.94049  | -0.35588 |
| H | -0.79567 | 3.87786  | -0.57684 |
| H | 0.07024  | 2.60696  | -0.43842 |
| O | -3.96722 | -1.60533 | -0.62971 |
| H | -4.87267 | -1.69742 | -0.31234 |
| H | -3.51169 | -1.08409 | 0.05205  |

EDT-(NH<sub>3</sub>)<sub>1</sub>-I

|   |          |          |          |
|---|----------|----------|----------|
| C | 0.14408  | 0.28272  | 1.0517   |
| H | 1.06278  | -0.09938 | 1.525    |
| H | -0.45673 | 0.81529  | 1.80485  |
| C | -0.63113 | -0.89906 | 0.46165  |
| H | -0.01332 | -1.4381  | -0.27085 |
| H | -0.88857 | -1.60249 | 1.27267  |
| S | -2.2491  | -0.45658 | -0.30186 |
| H | -1.73884 | 0.10398  | -1.42396 |
| S | 0.74565  | 1.49728  | -0.19665 |
| H | -0.45153 | 2.07943  | -0.44421 |
| N | 2.87155  | -1.28837 | -0.26497 |
| H | 2.52907  | -0.67209 | -1.00544 |
| H | 3.0433   | -2.1948  | -0.70439 |

H 3.79043 -0.92634 -0.00279

**EDT-(NH<sub>3</sub>)<sub>1</sub>-II**

C -0.30584 -1.12388 0.86049  
H -0.57437 -2.07962 1.34264  
H 0.2167 -0.50216 1.60391  
C -1.58972 -0.43724 0.37711  
H -2.1004 -1.05657 -0.3769  
H -2.27773 -0.29696 1.22939  
S -1.3484 1.25376 -0.31196  
H -0.60165 0.86039 -1.37257  
S 0.87944 -1.55023 -0.48708  
H 1.60366 -0.40312 -0.40673  
N 2.26596 1.64923 0.29483  
H 2.68998 2.31573 -0.3525  
H 2.75498 1.76614 1.18388  
H 1.30383 1.9618 0.44411

**EDT-(NH<sub>3</sub>)<sub>2</sub>-I**

C 0 -0.33543 -0.57954 -1.83918  
H 0 -0.13866 -1.17396 -2.73346  
H 0 -1.32885 -0.14458 -1.93991  
C 0 0.71951 0.50981 -1.72415  
H 0 1.70563 0.07565 -1.56507  
H 0 0.75048 1.07659 -2.65668  
S 0 0.41372 1.7496 -0.42812  
H 0 0.90789 1.03155 0.60388  
S 0 -0.3616 -1.77906 -0.47137  
H 0 -1.09137 -1.03241 0.38583  
N 0 -2.26391 0.3888 1.46414  
H 0 -2.10823 0.61041 2.44023  
H 0 -3.25953 0.4751 1.29888  
H 0 -1.79883 1.10909 0.91905  
N 0 1.7715 -0.35181 1.98115  
H 0 2.77683 -0.43896 2.06914  
H 0 1.45297 -1.0894 1.35925  
H 0 1.37927 -0.54609 2.89468

**EDT-(NH<sub>3</sub>)<sub>2</sub>-II**

C 1.56529 0.98154 -0.16374  
H 1.66775 1.96717 0.31226  
H 1.53181 1.13492 -1.24842  
C 0.28302 0.32538 0.33699

|   |          |          |          |
|---|----------|----------|----------|
| H | -0.5759  | 0.97773  | 0.11524  |
| H | 0.32336  | 0.15966  | 1.41974  |
| S | -0.13366 | -1.27411 | -0.48886 |
| H | 0.75686  | -2.05321 | 0.17424  |
| S | 3.13051  | 0.10156  | 0.26892  |
| H | 2.99278  | -0.91614 | -0.61761 |
| N | -3.73319 | -0.96499 | 0.45394  |
| H | -2.78783 | -1.3289  | 0.32432  |
| H | -4.33804 | -1.488   | -0.17646 |
| H | -4.01738 | -1.21282 | 1.39977  |
| N | -2.73171 | 2.03097  | -0.23527 |
| H | -3.06965 | 2.7333   | 0.42011  |
| H | -3.22168 | 1.15719  | -0.01699 |
| H | -3.04727 | 2.32655  | -1.15731 |

### EDT-(NH<sub>3</sub>)<sub>3</sub>-I

|   |   |          |          |          |
|---|---|----------|----------|----------|
| C | 0 | -0.09248 | 1.71568  | -0.31183 |
| H | 0 | 0.09858  | 2.58932  | -0.93779 |
| H | 0 | -0.03882 | 2.03515  | 0.72803  |
| C | 0 | 0.9593   | 0.65899  | -0.60608 |
| H | 0 | 0.86416  | 0.29417  | -1.62809 |
| H | 0 | 1.95627  | 1.08809  | -0.49037 |
| S | 0 | 0.93785  | -0.77624 | 0.51527  |
| H | 0 | 0.01587  | -1.49919 | -0.15835 |
| S | 0 | -1.80894 | 1.2342   | -0.68222 |
| H | 0 | -2.04368 | 0.57005  | 0.46958  |
| N | 0 | -2.04403 | -0.34533 | 2.41029  |
| H | 0 | -2.46994 | -1.2346  | 2.6421   |
| H | 0 | -2.12941 | 0.24323  | 3.23022  |
| H | 0 | -1.0541  | -0.51759 | 2.25947  |
| N | 0 | -1.47501 | -2.21558 | -1.48274 |
| H | 0 | -1.26481 | -2.5889  | -2.40062 |
| H | 0 | -1.76704 | -1.24954 | -1.60465 |
| H | 0 | -2.27816 | -2.72627 | -1.13581 |
| N | 0 | 4.32179  | 0.09434  | 0.04598  |
| H | 0 | 3.62186  | -0.63328 | 0.15051  |
| H | 0 | 4.87836  | 0.08808  | 0.89201  |
| H | 0 | 4.93657  | -0.19342 | -0.70555 |

### EDT-(NH<sub>3</sub>)<sub>3</sub>-II

|   |         |          |          |
|---|---------|----------|----------|
| C | 0.38314 | -0.54453 | -0.13686 |
| H | 0.69052 | -1.59862 | -0.10682 |

|   |          |          |          |
|---|----------|----------|----------|
| H | 0.19961  | -0.21946 | 0.89343  |
| C | -0.87962 | -0.41794 | -0.98359 |
| H | -0.68912 | -0.73406 | -2.01626 |
| H | -1.66492 | -1.06282 | -0.56231 |
| S | -1.64004 | 1.2649   | -1.02549 |
| H | -0.62688 | 1.87174  | -1.6959  |
| S | 1.85433  | 0.3781   | -0.77941 |
| H | 1.66651  | 1.51415  | -0.04237 |
| N | 0.74048  | 3.06135  | 1.23413  |
| H | 0.76895  | 3.02398  | 2.25111  |
| H | -0.19656 | 2.7788   | 0.94509  |
| H | 0.85428  | 4.03819  | 0.97105  |
| N | 3.15865  | -2.79067 | 0.55343  |
| H | 3.38989  | -2.84612 | 1.54377  |
| H | 3.20692  | -1.80405 | 0.29497  |
| H | 3.90876  | -3.26405 | 0.05289  |
| N | -3.48885 | -2.50495 | 0.4338   |
| H | -3.83433 | -2.23458 | 1.35288  |
| H | -3.24075 | -3.49086 | 0.49438  |
| H | -4.28069 | -2.44256 | -0.20364 |
